# Supplementary material for: Impact of Frailty on Outcomes in Atrial Fibrillation and HFpEF: Data from TOPCAT Trial
Source: Research Square preprint supplement (doi:10.21203/rs.3.rs-7297650/v1), 2025-10-17
Supplement: Supplementary file 2 [file e8ad2cc3852cce856105a789.docx]

**Supplementary Appendix**

**Table S1: frailty index deficits model (n=35 items)**

|  | Item | Standard | Score |
| --- | --- | --- | --- |
| 1 | Body mass index (BMI) (kg/m2) | BMI ≥25 but <30 | 0.5 |
| BMI ≥30 | 1 |
| BMI < 18.5 | 1 |
| 2 | Ejection fraction by echo (L/min) | Define by EF <50 | 1 |
| 3 | Creatinine (μmol/L) | >150 or <40 | 1 |
| 4 | Diastolic BP, high (mmHg) | ≥90 | 1 |
| 5 | eGFR ( ml/min/1.73 m2) | <60 | 1 |
| 6 | Fasting glucose (mmol/L) | >15 or <0.9 | 1 |
| 7 | Hemoglobin (g/dl) | >18 or <10.5 | 1 |
| 8 | Potassium (mmol/L) | >6 or <3.5 | 1 |
| 9 | Sodium (mEq/L) | >150 or <135 | 1 |
| 10 | Platelet count | use lower/upper 5th percentile | 1 |
| 11 | Pulse pressure (mmHg) | >55 | 1 |
| 12 | Systolic BP, high (mmHg) | ≥140 or ≤90 | 1 |
| 13 | White blood cell count | use lower/upper 5th percentile | 1 |
| 14 | Albumin (g/dL) | <3.2 or >4.5 | 1 |
| 15 | Coronary artery disease/ Myocardial infarction | Self Report or by record review | 1 |
| 16 | Diabetes | Self Report or by record review or use of a diabetic drug | 1 |
| 17 | Hypertension | Self Report or by record review | 1 |
| 18 | Chronic obstructive pulmonary disease | Self Report or by record review | 1 |
| 19 | Stroke | Self Report or by record review | 1 |
| 20 | Total number medications (*n*) | N <8 | 0 |
| 8<= *n* <12 | 0.5 |
| *n* >=12 | 1 |
| 21 | Kansas City Cardiomyopathy Questionnaire (KCCQ) Q1: Indicate how much you are limited by heart failure in your ability to do the following activities over the last 2 weeks:  Dressing yourself  Showering/Bathing  Walking 1 block on level ground  Doing yardwork, housework or carrying groceries  Climbing a flight of stairs without stopping  Hurrying or jogging (as if to catch a bus) | Extremely limited | 1 |
| Quite a bit limited | 0.8 |
| Moderate limited | 0.6 |
| Slightly limited | 0.4 |
| Not at all limited/Missing Data | 0.2 |
| 22 | KCCQ Q2: Compared with 2 weeks ago, my symptoms of heart failure have become | Much worse | 1 |
| Slightly worse | 0.8 |
| Not changed | 0.6 |
| Slightly better | 0.4 |
| Much better/no symptoms | 0.2 |
| 23 | KCCQ Q3: Over the past 2 weeks, how many times did you have swelling in your feet, ankles, or legs when you woke up in the morning? | Every morning | 1 |
| 3 or more times per week but not every day | 0.75 |
| 1-2 times a week | 0.5 |
| Less than once a week | 0.25 |
| Never over the past 2 weeks | 0 |
| 24 | KCCQ Q4: Over the past 2 weeks, how much has swelling in your feet, ankles, or legs bothered you? | Extremely bothersome | 1 |
| Quite a bit bothersome | 0.8 |
| Moderately bothersome | 0.6 |
| Slightly bothersome | 0.4 |
| No Swelling or Missing Data | 0.2 |
| 25 | KCCQ Q5: Over the past 2 weeks, on average, how many times has fatigue limited your ability to do what you want? | All of the time | 1 |
| Several times per day | 0.8 |
| At least once a day | 0.6 |
| 3 or more times per week, but not every day | 0.4 |
| 1-2 times per week | 0.2 |
| Less than once a week or never | 0 |
| 26 | KCCQ Q6: Over the past 2 weeks, how much has your fatigued bothered you? | Extremely bothersome | 1 |
| Quite a bit bothersome | 0.8 |
| Moderately bothersome | 0.6 |
| Slightly bothersome | 0.4 |
| Not bothersome at all, no fatigue | 0.2 |
| 27 | KCCQ Q7: Over the past 2 weeks, on average, how many times has shortness of breath (SOB) limited your ability to do what you wanted? | All of the time | 1 |
| Several times per day | 0.8 |
| At least once a day | 0.6 |
| 3 or more times per week, but not every day | 0.4 |
| 1-2 times per week | 0.2 |
| Less than once a week, never, or missing data | 0 |
| 28 | KCCQ Q8: Over the past 2 weeks, how much has your SOB bothered you? | Extremely bothersome | 1 |
| Quite a bit bothersome | 0.8 |
| Moderately bothersome | 0.6 |
| Slightly bothersome | 0.4 |
| Not bothersome at all, no SOB, or Missing Data | 0.2 |
| 29 | KCCQ Q9: Over the past 2 weeks, on average, how many times have you been forced to sleep sitting up in a chair or with at least 3 pillows to prop you up because of SOB? | Every night | 1 |
| 3 or more times a week but not every day | 0.75 |
| 1-2 times per week | 0.5 |
| Less than once a week | 0.25 |
| Never or Missing Data | 0 |
| 30 | KCCQ Q10: How sure are you that you know what to do or whom to call if your heart failure gets worse? | Not at all sure | 1 |
| Not very sure | 0.75 |
| Somewhat sure | 0.5 |
| Mostly sure | 0.25 |
| Completely sure or missing data | 0 |
| 31 | KCCQ Q11: How well do you understand what things you are able to do to keep 37your heart failure symptom from getting worse? | Do not understand at all | 1 |
| Do not understand 35very well | 0.75 |
| Somewhat understand | 0.5 |
| Mostly understand | 0.25 |
| Completely understand | 0 |
| 32 | KCCQ Q12: Over the past 2 weeks, how much has your heart failure limited your enjoyment in life | Extremely | 1 |
| Quite a bit | 0.75 |
| Moderately | 0.5 |
| Slightly | 0.25 |
| Not at all | 0 |
| 33 | KCCQ Q13: If you had to spend the rest of your life with your heart failure the way it is right now, how would you feel about this? | Not at all satisfied | 1 |
| Mostly dissatisfied | 0.75 |
| Somewhat satisfied | 0.5 |
| Mostly satisfied | 0.25 |
| Completely satisfied | 0 |
| 34 | KCCQ Q14: Over the past 2 weeks, how often have you felt discouraged or down in the dumps because of your heart failure? | All of the time | 1 |
| Most of the time | 0.75 |
| Occasionally | 0.5 |
| Rarely | 0.25 |
| Never | 0 |
| 35 | KCCQ Q 15: How has your heart failure limited your participation in the following activities over the past 2 weeks?  Hobbies, recreational activities  Working or doing household chores  Visiting family or friends out of your home  Intimate relationships with loved ones | Severely limited | 1 |
| Limited quite a bit | 0.8 |
| Moderately limited | 0.6 |
| Slightly limited | 0.4 |
| Did not limit | 0.2 |
